# Supplementary material
Source: publisher figshare collection journal article supplement (https://acs.figshare.com/ndownloader/files/15455120)
Supplement: Supplementary file 1 [file 15455120]

# Supporting information

## **A novel anode for direct borohydride-hydrogen peroxide fuel cell: Au nanoparticles decorated 3D self-supported reduced graphene oxide foam**

Biaopeng Li, Congying Song, Xiaomei Huang\*, Ke Ye, Kui Cheng, Kai Zhu, Jun Yan, Dianxue Cao, Guiling Wang\*

*Key Laboratory of Superlight Materials and Surface Technology of Ministry of Education, College of Materials*

*Science and Chemical Engineering. Harbin Engineering University, Harbin, 150001, P.R.China.*

Corresponding Authors:

Guiling Wang\* E-mail: [wangguiling@hrbeu.edu.cn](mailto:wangguiling@hrbeu.edu.cn)

Xiaomei Huang\* E-mail: [huangxiaomei@hrbeu.edu.cn](mailto:huangxiaomei@hrbeu.edu.cn)

### **Table of Contents**

|                                                                          |     |
|--------------------------------------------------------------------------|-----|
| Flexibility display of rGO foam and Au-NP@eGO foam electrode.....        | S2  |
| SEM images of Au-NP@Ni foam electrode.....                               | S3  |
| The electrochemical active surface area of Au-NP@Ni foam electrode.....  | S3  |
| Study on kinetic parameters in NaBH <sub>4</sub> oxidation reaction..... | S3  |
| Utilization of NaBH <sub>4</sub> on Au-NP@rGO foam electrode.....        | S6  |
| Electrochemical impedance study.....                                     | S6  |
| Fuel cell performance comparison.....                                    | S9  |
| Reference.....                                                           | S10 |

## Flexibility display of rGO foam and Au-NP@eGO foam electrode

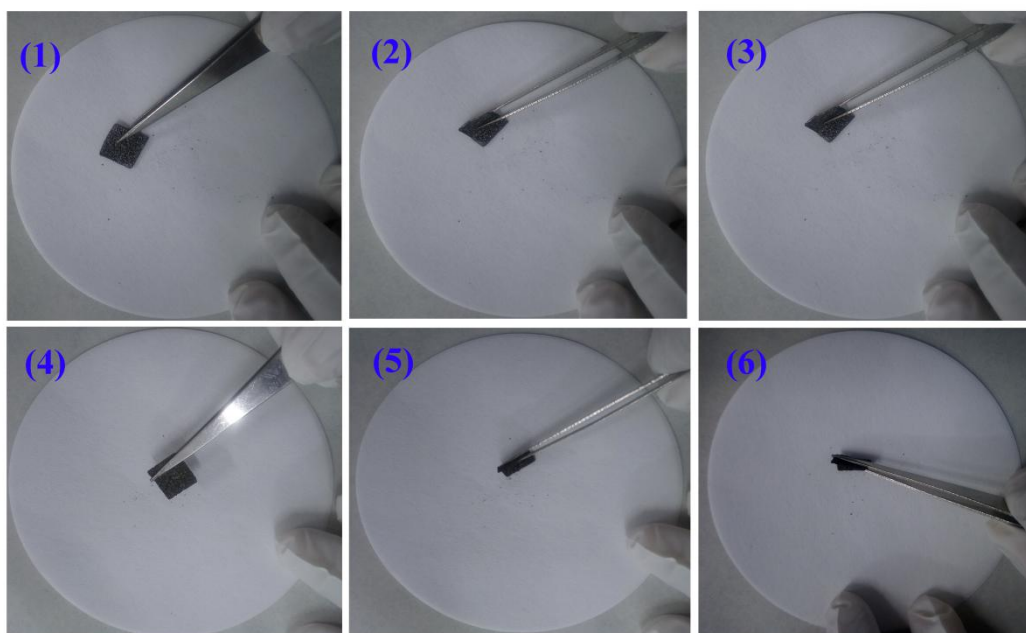

Fig. S1 The flexibility display of rGO foam.

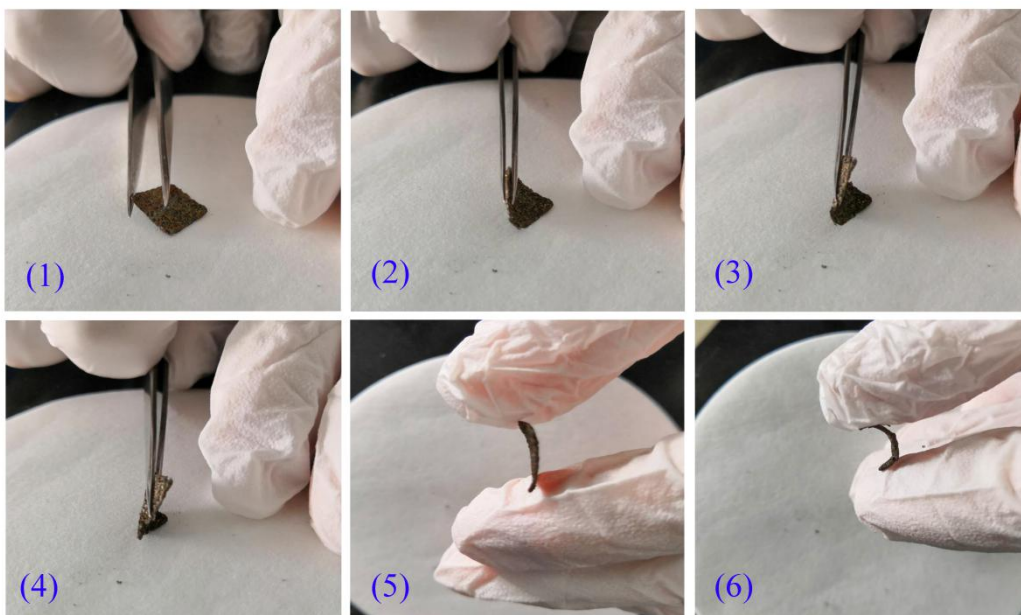

Fig. S2 The flexibility display of Au-NP@rGO foam electrode.

## SEM images of Au-NP@Ni foam electrode

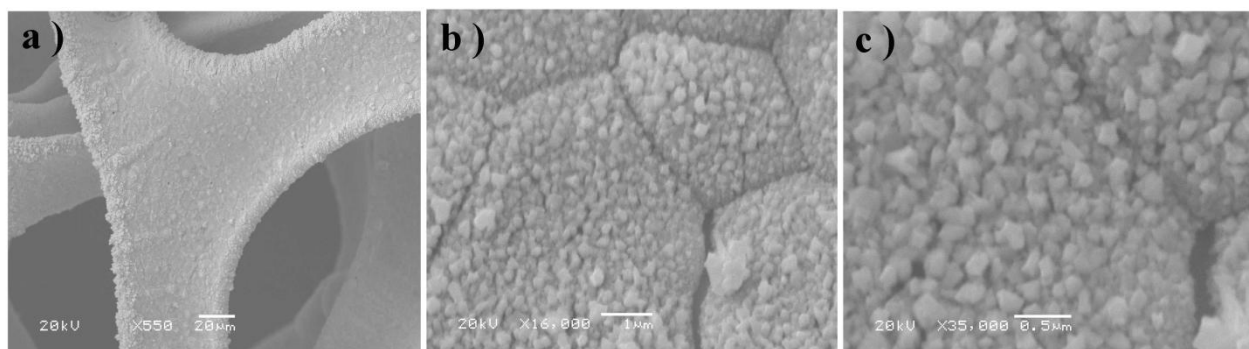

Fig. S3 SEM images of Au-NP@Ni foam electrode.

## The electrochemical active surface area of Au-NP@Ni foam electrode

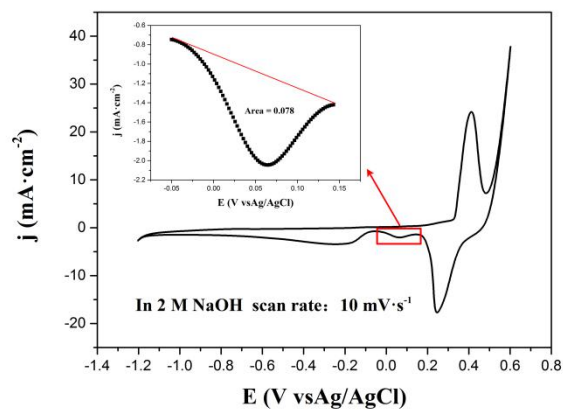

Fig. S4 A wide potential window CV tests of Au-NP@Ni foam electrode that tested in 2 mol·L<sup>-1</sup> NaOH at a scan rate of 10 mV·s<sup>-1</sup>.

## Study on kinetic parameters in NaBH<sub>4</sub> oxidation reaction

The oxidation of NaBH<sub>4</sub> on the Au-NP@rGO foam and Au-NP@Ni foam electrode can be evaluated by the following equation [S1]:

$$j_p = zC_{NaBH_4}^\beta \quad (Eq. S1)$$

Where  $j_p$  is the peak current density (A·cm<sup>-2</sup>),  $z$  is a constant,  $C$  refers to the NaBH<sub>4</sub> concentration (mol·cm<sup>-3</sup>) and  $\beta$  is the reaction order concerning  $C_{NaBH_4}$ . According to the slopes of  $\ln j$  vs.  $\ln C_{NaBH_4}$  plots in Fig. 4(c) and Fig. S5(c), the value of  $\beta$  is calculated as 0.96 and 0.95 on Au-NP@rGO foam and Au-NP@Ni foam electrode, respectively.

The relationship between peak potential,  $E_p$  (V), and scan rate  $v$  (V·s<sup>-1</sup>) for an irreversible electrochemical process can be described by Eq. S2 [S2].

$$E_p = E^0 + \left[ \frac{RT}{(1-\alpha)n_a F} \right] \left\{ 0.78 + \ln \frac{D}{k_s} + \ln \left[ \frac{(1-\alpha)n_a F v}{RT} \right]^{1/2} \right\} \quad (Eq. S2)$$

where  $E^0$  is the formal potential (V),  $R$  is the universal gas constant (8.314 JK<sup>-1</sup>·mol<sup>-1</sup>),  $T$  is the temperature (K),  $\alpha$  is the charge transfer coefficient,  $n_a$  is the number of electrons involved in the rate-determining step,  $F$  is the Faraday constant (96485 C·mol<sup>-1</sup>),  $D$  is the diffusion coefficient of BH<sub>4</sub><sup>-</sup> (cm<sup>2</sup>·s<sup>-1</sup>) and  $k_s$  is the standard heterogeneous rate constant (cm·s<sup>-1</sup>).

$D_{BH_4^-}$  values at different temperatures used for evaluation of  $n$ , were calculated

using the expression proposed by Wang and coworkers [S3] (Eq. (S3)) that takes into account  $D_{BH_4^-}$  change with the temperature, which is valid for 2 M NaOH solutions and does not depend on  $BH_4^-$  concentration.

$$D_{BH_4^-} = 5.57 \times 10^{-3} \exp\left(\frac{-15.2 \times 10^3}{RT}\right) \quad (Eq. S3)$$

The values calculated from Eq. (S3) were multiplied by 2, as recent precise  $D_{BH_4^-}$  determination [S4] has shown that exact  $D_{BH_4^-}$  values are twice of those generally reported in the literature.

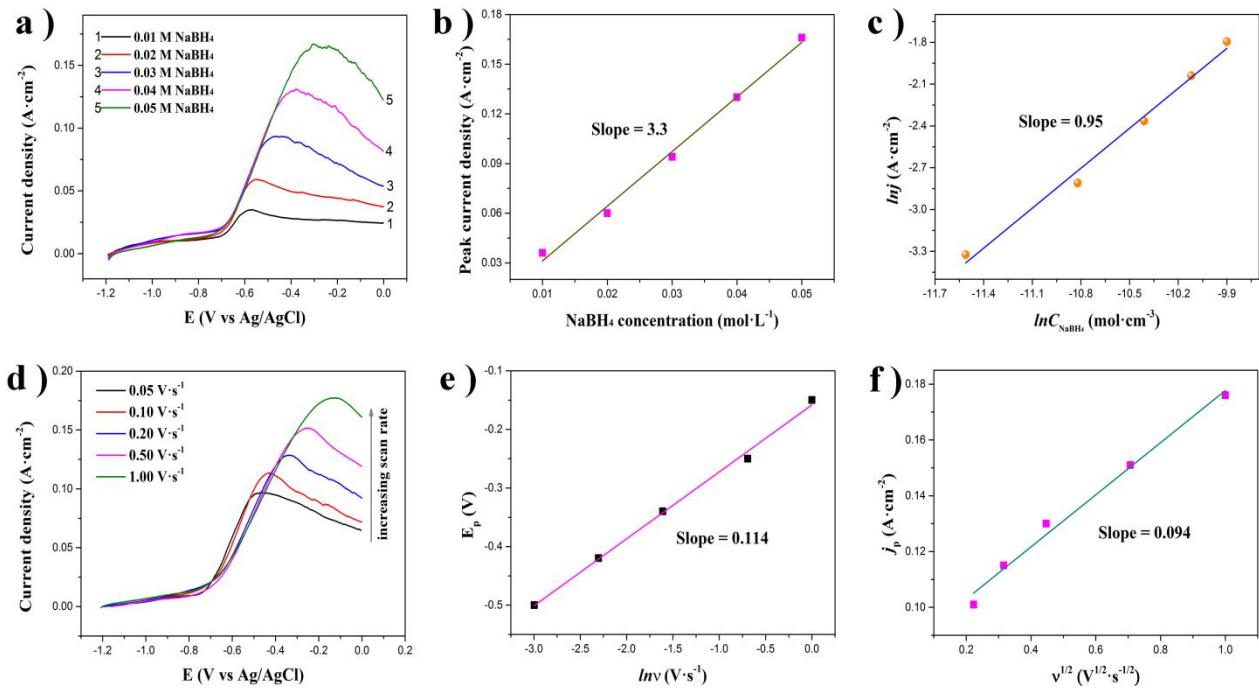

Fig. S5 LSV curves of Au-NP@Ni foam electrode under different concentration of NaBH<sub>4</sub> and 2 M NaOH at a scan rate of 50 mV·s<sup>-1</sup> (a) and the corresponding  $j_p$  vs.  $C_{NaBH_4}$  plots (b),  $\ln j_p$  vs.  $\ln C_{NaBH_4}$  plots (c). LSV curves recorded at different  $v$  of Au-NP@Ni foam electrode in 2 M NaOH and 0.03 M NaBH<sub>4</sub> (d) with the dependence of  $E_p$  on  $\ln v$  (e) and dependence of  $j_p$  on  $v^{1/2}$  (f).

## Utilization of NaBH<sub>4</sub> on Au-NP@rGO foam electrode

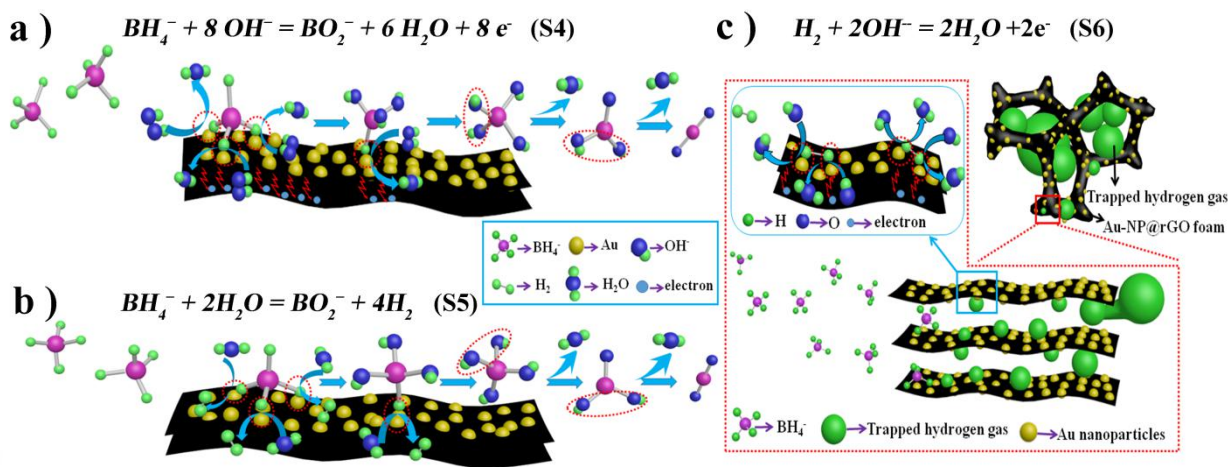

Fig. S6 Schematic diagram of electro-oxidation of NaBH<sub>4</sub> (a), hydrolysis of NaBH<sub>4</sub> (b) and the electro-oxidation of trapped hydrogen which produced by the hydrolysis of NaBH<sub>4</sub> (c).

## Electrochemical impedance study

Fig. S7(a) shows the Nyquist plots under the situations of absence and presence of NaBH<sub>4</sub> at -0.1 V. Without NaBH<sub>4</sub>, the Nyquist plots contain a semicircle in the high-frequency region and a straight line in the low-frequency region which indicates that electrochemical process is controlled by both charge transfer process and diffusion processes. When NaBH<sub>4</sub> was added to the solution, the Nyquist plots displayed two adjacent semicircles in high and low-frequency regions, respectively. From the comparison of Nyquist plots in Fig. S7(a), it is not difficult to conclude that when NaBH<sub>4</sub> is added to the solution, the semicircles in low-frequency regions can be attributed to the direct oxidation of NaBH<sub>4</sub>. Besides, the Nyquist plots in 2 mol·L<sup>-1</sup> NaOH and 0.4 mol·L<sup>-1</sup> NaBH<sub>4</sub> at different potentials

were displayed in Fig. S7(b). With the polarization potential moving to a more positive value, the charge transfer resistance displayed an unceasingly decreased trend. This phenomenon implies that a more positive potential is beneficial to reduce the charge transfer resistance and accelerate the electrooxidation of  $\text{NaBH}_4$  [S5].

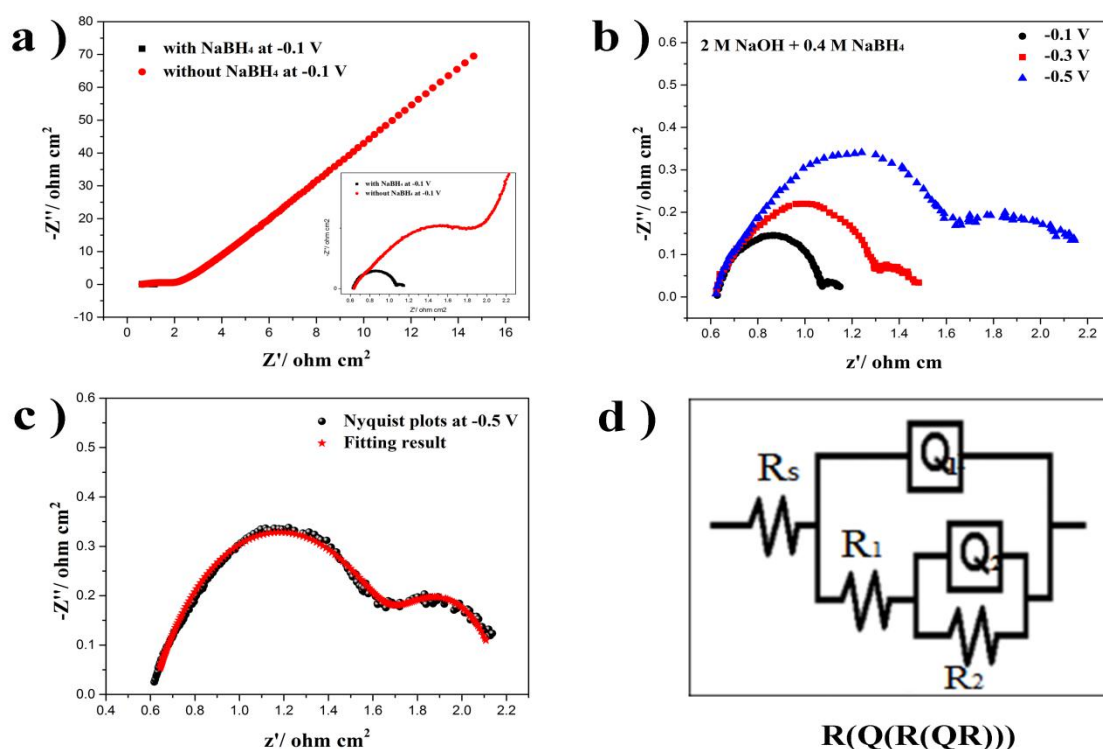

Fig. S7 Nyquist plots in the situations of presence and absence of  $\text{NaBH}_4$  at -0.1 V (a). Nyquist plots at different potentials in 2 mol·L<sup>-1</sup> NaOH and 0.4 mol·L<sup>-1</sup>  $\text{NaBH}_4$  (b). Nyquist fitting curves (c) and the corresponding equivalent circuit diagrams (d). Frequency range: 100 kHz to 10 mHz.

The Nyquist fitting curve was shown in Fig. S7(c), and ZSimDemo software was used to perform the fitting. Fig. S7(d) shows the corresponding equivalent circuit diagram. In the equivalent circuit diagram,  $R_s$  is the solution resistance;  $R_1$  means the charge transfer resistance of the transition between Au oxide and Au [S6];



$R_2$  represents the charge transfer resistance of direct electrooxidation of  $\text{NaBH}_4$  on the electrode.  $Q_1$  and  $Q_2$  are the constant phase element (CPE). The specific value of each component is shown in Table. S1. The value of solution resistance ( $R_s$ ) of Au-NP@rGO foam electrode in 2 M NaOH and 0.4 M  $\text{NaBH}_4$  is  $0.6 \, \Omega$ , which reveals the good conductivity of the electrode in the test solution. When the positive move the potential from -0.5 V to -0.1 V, the charge transfer resistance ( $R_1$ ) of the transition between Au oxide and Au is reduced from 1.133 to  $0.447 \, \Omega$ , indicating that a more positive potential is helpful for the regeneration of the Au catalyst. Also, with the positive move of potential, charge transfer resistance of direct electrooxidation of  $\text{NaBH}_4$  ( $R_2$ ) is decreased from 0.397 to  $0.108 \, \Omega$  reveals that the oxidation of  $\text{NaBH}_4$  is easier to occur at a positive potential. The minimal charge transfer resistance of  $\text{NaBH}_4$  electrooxidation reaction implies that Au-NP@rGO foam electrode is a high-efficiency catalyst.

Table. S1 The value of each circuit component at different potentials

| Potential<br>(V) | $R_s$<br>( $\Omega \cdot \text{cm}^2$ ) | $Q_1\text{-}Y_0$<br>( $\Omega^{-1} \cdot \text{m}^{-2} \cdot \text{s}^n$ ) | $Q_1\text{-}n$ | $R_1$<br>( $\Omega \cdot \text{cm}^2$ ) | $Q_2\text{-}Y_0$<br>( $\Omega^{-1} \cdot \text{m}^{-2} \cdot \text{s}^n$ ) | $Q_2\text{-}n$ | $R_2$<br>( $\Omega \cdot \text{cm}^2$ ) |
|------------------|-----------------------------------------|----------------------------------------------------------------------------|----------------|-----------------------------------------|----------------------------------------------------------------------------|----------------|-----------------------------------------|
| -0.5             | 0.61                                    | 0.003056                                                                   | 0.7693         | 1.133                                   | 0.1112                                                                     | 0.7528         | 0.397                                   |
| -0.3             | 0.60                                    | 0.002918                                                                   | 0.7693         | 0.764                                   | 0.8056                                                                     | 0.7852         | 0.231                                   |
| -0.1             | 0.62                                    | 0.000872                                                                   | 0.8603         | 0.447                                   | 0.8781                                                                     | 0.6795         | 0.108                                   |



## Fuel cell performance comparison

Table S2. Fuel cell Performance Comparison for Various Reported Anode

| Anode catalyst                                                                       | Cathode catalyst                                                  | Anode fuel                            | Cathodic oxidant                                                         | Open-circle voltage (V) | Power density (mW·cm <sup>-2</sup> ) | ref       |
|--------------------------------------------------------------------------------------|-------------------------------------------------------------------|---------------------------------------|--------------------------------------------------------------------------|-------------------------|--------------------------------------|-----------|
| Au/C (0.17 mg Au cm <sup>-2</sup> )                                                  | Pt mesh                                                           | 0.5 M NaBH <sub>4</sub> + 2 M NaOH    | 4.5 M H <sub>2</sub> O <sub>2</sub> + 2.0 M HCl                          | 1.41                    | 8.72                                 | [S5]      |
| Au <sub>2</sub> Ni <sub>1</sub> Cu <sub>1</sub> /C (0.17 mg metal cm <sup>-2</sup> ) | Pt mesh                                                           | 0.5 M NaBH <sub>4</sub> + 2 M NaOH    | 4.5 M H <sub>2</sub> O <sub>2</sub> + 2.0 M HCl                          | 1.78                    | 60.51                                | [S5]      |
| Au/C (2 mg of Au cm <sup>-2</sup> )                                                  | Pt/C                                                              | 2.5 M NaOH + 1.32 M NaBH <sub>4</sub> | O <sub>2</sub>                                                           | -                       | 72                                   | [S7]      |
| Pt/PPy-C <sub>35</sub> % (0.05 mg of Pt cm <sup>-2</sup> )                           | Pt/PPy-C <sub>35</sub> %                                          | 1 M NaBH <sub>4</sub> + 4 M NaOH      | 5 M H <sub>2</sub> O <sub>2</sub> + 1.5 M HCl                            | 1.77                    | 59.6                                 | [S8]      |
| Pt/C (4 mg of Pt cm <sup>-2</sup> )                                                  | Pt/C                                                              | 3 M NaOH + 1 M NaBH <sub>4</sub>      | 2 M H <sub>2</sub> O <sub>2</sub> + 0.5 M H <sub>2</sub> SO <sub>4</sub> | 1.66                    | 35                                   | [S9]      |
| Pt/C                                                                                 | Pt mesh                                                           | 2 M NaOH + 0.5 M NaBH <sub>4</sub>    | 4.5 M H <sub>2</sub> O <sub>2</sub> + 2.0 M HCl                          | 1.8                     | 31.4                                 | [S10]     |
| Pd(hollow)/C (0.9 mg of Pd cm <sup>-2</sup> )                                        | Pt/C                                                              | 3 M NaOH + 1 M NaBH <sub>4</sub>      | 2 M H <sub>2</sub> O <sub>2</sub> + 1 M H <sub>2</sub> SO <sub>4</sub>   | 1.84                    | 48.4                                 | [S10]     |
| Au/C (0.9 mg metal cm <sup>-2</sup> )                                                | Au/C                                                              | 1 M NaBH <sub>4</sub> + 3 M NaOH      | 2 M H <sub>2</sub> O <sub>2</sub> + 0.5 M H <sub>2</sub> SO <sub>4</sub> | 1.6                     | 21.8                                 | [S11]     |
| Au <sub>50</sub> Fe <sub>50</sub> /C (0.9 mg metal cm <sup>-2</sup> )                | Au/C                                                              | 1 M NaBH <sub>4</sub> + 3 M NaOH      | 2 M H <sub>2</sub> O <sub>2</sub> + 0.5 M H <sub>2</sub> SO <sub>4</sub> | 1.6                     | 34.9                                 | [S11]     |
| Au@CoB (70 mg cm <sup>-2</sup> )                                                     | LaNi <sub>0.9</sub> Ru <sub>0.1</sub> O <sub>3</sub> /CNT/Ni foam | 0.8 M KBH <sub>4</sub> + 6 M KOH      | Air                                                                      | 1.07                    | 85                                   | [S12]     |
| pure Au                                                                              | LaNi <sub>0.9</sub> Ru <sub>0.1</sub> O <sub>3</sub> /CNT/Ni foam | 0.8 M KBH <sub>4</sub> + 6 M KOH      | Air                                                                      | 1                       | 46                                   | [S12]     |
| Pt/C pasted on carbon cloth (0.5mg·cm <sup>-2</sup> )                                | commercial Pt/C                                                   | 1 M NaBH <sub>4</sub> + 5 M NaOH      | pure oxygen                                                              | 0.92                    | 46.5                                 | [S13]     |
| Au-NP@rGO foam (1.7 mg metal cm <sup>-2</sup> )                                      | Pd/C                                                              | 0.4 M NaBH <sub>4</sub> + 2 M NaOH    | 2 M H <sub>2</sub> O <sub>2</sub> + 0.8 M H <sub>2</sub> SO <sub>4</sub> | 1.63                    | 60                                   | This work |

## Reference

- [S1]Šljukić, B.; Milikić, J.; Santos, D. M. F.; Sequeira, C. A. C.; Macciò, D.; Saccone, A. Electrocatalytic performance of Pt–Dy alloys for direct borohydride fuel cells. *J. Power Sources* 2014, 272, 335-343, DOI: 10.1016/j.jpowsour.2014.08.080.
- [S2]Santos, D. M. F.; Sequeira, C. A. C. Cyclic voltammetry investigation of borohydride oxidation at a gold electrode. *Electrochim. Acta* 2010, 55 (22), 6775-6781, DOI: 10.1016/j.electacta.2010.05.091.
- [S3]Wang, K.; Lu, J.; Zhuang, L. Direct determination of diffusion coefficient for borohydride anions in alkaline solutions using chronoamperometry with spherical Au electrodes. *J. Electroanal. Chem.* 2005, 585 (2), 191-196, DOI: 10.1016/j.jelechem.2005.08.009.
- [S4]Chatenet, M.; Lima, F. H. B.; Ticianelli, E. A. Gold is not a Faradaic-Efficient Borohydride Oxidation Electrocatalyst: An Online Electrochemical Mass Spectrometry Study. *J. Electrochem. Soc.* 2010, 157,B697-B704, DOI: 10.1149/1.3328179.
- [S5]Duan, D.; Yin, X.; Wang, Q.; Liu, S.; Wang, Y. Performance evaluation of borohydride electrooxidation reaction with ternary alloy Au-Ni-Cu/C catalysts. *J. Appl. Electrochem.* 2018, 48 (7), 835-847, DOI: 10.1007/s10800-018-1208-0.
- [S6]Datta, J.; Dutta, A.; Mukherjee, S. The Beneficial Role of the Cometal Pd and Au in the Carbon-Supported PtPdAu Catalyst Toward Promoting Ethanol Oxidation Kinetics in Alkaline Fuel Cells: Temperature Effect and Reaction Mechanism. *J. Phys. Chem. C* 2011, 115 (31), 15324-15334, DOI: 10.1021/jp200318m.
- [S7]Merino-Jiménez, I.; Ponce de León, C.; Shah, A. A.; Walsh, F. C. Developments in direct borohydride fuel cells and remaining challenges. *J. Power Sources* 2012, 219, 339-357, DOI:

10.1016/j.jpowsour.2012.06.091.

[S8]Oliveira, R. C. P.; Milikić, J.; Daş, E.; Yurtcan, A. B.; Santos, D. M. F.; Šljukić, B. Platinum/polypyrrole-carbon electrocatalysts for direct borohydride-peroxide fuel cells. *Appl. Catal., B* 2018, 238, 454-464, DOI: 10.1016/j.apcatb.2018.06.057.

[S9]Yi, L.; Yu, B.; Yi, W.; Zhou, Y.; Ding, R.; Wang, X. Carbon-Supported Bimetallic Platinum-Iron Nanocatalysts: Application in Direct Borohydride/Hydrogen Peroxide Fuel Cell. *ACS Sustain Chem Eng* 2018, 6 (7), 8142-8149, DOI: 10.1021/acssuschemeng.7b04438.

[S10]Duan, D.; You, X.; Liang, J.; Liu, S.; Wang, Y. Carbon supported Cu-Pd nanoparticles as anode catalyst for direct borohydride-hydrogen peroxide fuel cells. *Electrochim. Acta* 2015, 176, 1126-1135, DOI: 10.1016/j.electacta.2015.07.118.

[S11]Yi, L.; Wei, W.; Zhao, C.; Tian, L.; Liu, J.; Wang, X. Enhanced activity of Au – Fe/C anodic electrocatalyst for direct borohydride-hydrogen peroxide fuel cell. *J. Power Sources* 2015, 285, 325-333, DOI: 10.1016/j.jpowsour.2015.03.118.

[S12] Li, S.; Wang, L.; Chu, J.; Zhu, H.; Chen, Y.; Liu, Y. Investigation of Au@Co-B nanoparticles as anode catalyst for direct borohydride fuel cells. *Int. J. Hydrogen Energy* 2016, 41 (20), 8583-8588, DOI: 10.1016/j.ijhydene.2016.02.128.

[S13]Olu, P.-Y.; Deschamps, F.; Caldarella, G.; Chatenet, M.; Job, N. Investigation of platinum and palladium as potential anodic catalysts for direct borohydride and ammonia borane fuel cells. *J. Power Sources* 2015, 297, 492-503, DOI: 10.1016/j.jpowsour.2015.08.022.
